# Supplementary material for: PsychoAge and SubjAge: development of deep markers of psychological and subjective age using artificial intelligence
Source: publisher site journal article supplement (doi:10.18632/aging.202344), 2020-12-08
Supplement: Supplementary file [file aging-v12i23-202344-supplementary-material-SD2.pdf]

## SUPPLEMENTARY TABLES

Supplementary Table 1. PFI importance scores for features used in PsychoAge.

| Domains                                      | Features                                                                               | PFI value                                      |       |
|----------------------------------------------|----------------------------------------------------------------------------------------|------------------------------------------------|-------|
| <b>Health</b>                                | Health limits on vigorous activity                                                     | 1.155                                          |       |
|                                              | Prescription medications for blood pressure                                            | 1.054                                          |       |
|                                              | Headaches frequency (30 days)                                                          | 0.727                                          |       |
|                                              | Health compared to others your age                                                     | 0.491                                          |       |
|                                              | Health locus of control - others                                                       | 0.170                                          |       |
|                                              | Body mass index                                                                        | 0.135                                          |       |
|                                              | Mental/emotional health self-evaluated                                                 | 0.100                                          |       |
|                                              | Thought/effort put in health                                                           | 0.066                                          |       |
|                                              | Any chronic conditions (12 months)                                                     | 0.061                                          |       |
|                                              | Shortness of breath during a little physical activity such as walking up a slight hill | 0.033                                          |       |
|                                              | Health 10 years in future                                                              | 0.027                                          |       |
|                                              | Health locus of control - Self                                                         | 0.017                                          |       |
|                                              | Current opinion about health                                                           | < 0.01                                         |       |
|                                              | <b>Closer relationships</b>                                                            | Rate sexual aspects of life 10 years in future | 1.542 |
|                                              |                                                                                        | Marital status                                 | 0.991 |
| Thought/effort sexual aspect of life         |                                                                                        | 0.192                                          |       |
| Current opinion about sexual aspects of life |                                                                                        | 0.065                                          |       |
| <b>Images of life changes</b>                | Age men enter middle age                                                               | 0.639                                          |       |
|                                              | Age women enter middle age                                                             | 0.177                                          |       |
|                                              | Age men no longer identify as middle age                                               | 0.177                                          |       |
|                                              | Age women no longer identify as middle age                                             | 0.040                                          |       |
| <b>Occupational features</b>                 | Current opinion about work situation 10 years future                                   | 0.498                                          |       |
|                                              | Current opinion about work situation                                                   | 0.297                                          |       |
|                                              | Thought/effort in work                                                                 | 0.082                                          |       |
| <b>Community involvement</b>                 | Contribution to others welfare 10 years future                                         | 0.400                                          |       |
|                                              | Community as source of comfort                                                         | 0.275                                          |       |
|                                              | Unique contributions to society                                                        | 0.092                                          |       |
|                                              | Current opinion about contribution to others' welfare                                  | 0.035                                          |       |
|                                              | World is becoming better place                                                         | 0.033                                          |       |
|                                              | Thought/effort in contribution to others welfare                                       | 0.033                                          |       |
| <b>Personality traits</b>                    | Satisfied with self at present                                                         | < 0.01                                         |       |
|                                              | Neuroticism as a personality trait                                                     | 0.154                                          |       |
|                                              | Extraversion as a personality trait                                                    | 0.070                                          |       |
|                                              | Openness as a personality trait                                                        | 0.030                                          |       |
|                                              | Agreeableness as a personality trait                                                   | 0.026                                          |       |
|                                              | Agency as a personality trait                                                          | 0.020                                          |       |
|                                              | Conscientiousness as a personality trait                                               | < 0.01                                         |       |
| <b>Psychological Beliefs</b>                 | Forceful as a psychological trait                                                      | 0.108                                          |       |
|                                              | Lower aspirations (secondary control)                                                  | 0.089                                          |       |
|                                              | Live for today                                                                         | 0.003                                          |       |
|                                              | Positive reappraisal (secondary control)                                               | 0.028                                          |       |
|                                              | Persist in goal striving (primary control)                                             | 0.024                                          |       |
|                                              | Optimistic as a psychological trait                                                    | 0.006                                          |       |
|                                              | Outgoing as a psychological trait                                                      | < 0.01                                         |       |

|                             |                                              |        |
|-----------------------------|----------------------------------------------|--------|
| <b>Demographic features</b> | Highest level of education completed         | 0.129  |
|                             | Sex                                          | 0.085  |
| <b>Well-being</b>           | Satisfied with life at present               | 0.091  |
|                             | Current opinion about life overall currently | 0.084  |
|                             | Control over life in general at present      | 0.026  |
|                             | Thought/effort in life overall               | < 0.01 |

**Supplementary Table 2. The performance of models trained on the MIDUS 1 dataset (all ages) and its age group subsamples (25-39, 40-64, 65-75).**

| Dataset                | Chronological Age, years | R <sup>2</sup> | MAE, years | Baseline MAE, years | $\epsilon$ -accuracy | N, people |      |
|------------------------|--------------------------|----------------|------------|---------------------|----------------------|-----------|------|
| <b>MIDUS 1</b>         | 25-39                    | 0.07           | 3.35       | 3.56                | 1.0                  | 2040      |      |
|                        | Psychological age        | 40-64          | 0.26       | 4.91                | 6.00                 | 0.9       | 3339 |
|                        |                          | 65-75          | -0.09      | 2.45                | 2.39                 | 1.0       | 682  |
|                        |                          | all ages       | 0.56       | 6.70                | 10.79                | 0.78      | 6071 |
| Subjective age         | 25-39                    | 0.01           | 5.23       | 5.04                | 0.88                 | 2040      |      |
|                        | 40-64                    | 0.15           | 6.89       | 7.40                | 0.76                 | 3339      |      |
|                        | 65-75                    | 0.05           | 7.63       | 8.07                | 0.72                 | 682       |      |
|                        | all ages                 | 0.4            | 7.32       | 9.78                | 0.74                 | 6071      |      |
| <b>MIDUS 2</b>         | 25-39                    | -2.93          | 3.00       | 1.51                | 1.0                  | 346       |      |
|                        | Psychological age        | 40-64          | 0.25       | 4.93                | 5.94                 | 0.91      | 2492 |
|                        |                          | 65-75          | -0.07      | 2.52                | 2.70                 | 1.0       | 738  |
|                        |                          | all ages       | 0.46       | 7.18                | 10.27                | 0.73      | 3870 |
| Subjective age         | 25-39                    | 0.05           | 4.90       | 4.87                | 0.9                  | 346       |      |
|                        | 40-64                    | 0.15           | 7.57       | 8.30                | 0.72                 | 2492      |      |
|                        | 65-75                    | 0.04           | 7.50       | 8.05                | 0.73                 | 738       |      |
|                        | all ages                 | 0.32           | 8.53       | 10.72               | 0.66                 | 3870      |      |
| <b>MIDUS Refresher</b> | 25-40                    | -0.02          | 2.97       | 2.86                | 1.0                  | 591       |      |
|                        | Psychological age        | 40-65          | 0.21       | 5.56                | 6.40                 | 0.88      | 1300 |
|                        |                          | 65-75          | -0.01      | 2.33                | 2.61                 | 1.0       | 624  |
|                        |                          | all age        | 0.56       | 7.73                | 12.36                | 0.7       | 2521 |
| Subjective age         | 25-40                    | 0.07           | 5.67       | 5.62                | 0.85                 | 591       |      |
|                        | 40-65                    | 0.15           | 7.84       | 8.69                | 0.70                 | 1300      |      |
|                        | 65-75                    | 0.04           | 8.27       | 8.51                | 0.68                 | 624       |      |
|                        | all age                  | 0.34           | 8.56       | 11.27               | 0.65                 | 2521      |      |

DNNs were validated on two datasets: MIDUS 2 and MIDUS Refresher with 50 input features.
